# Supplementary material for: Optogenetics reveals Cdc42 local activation by scaffold-mediated positive feedback and Ras GTPase
Source: PubMed Central journal article supplement (PMC7002011; doi:10.1371/journal.pbio.3000600), 2020-01-24

Figure S1

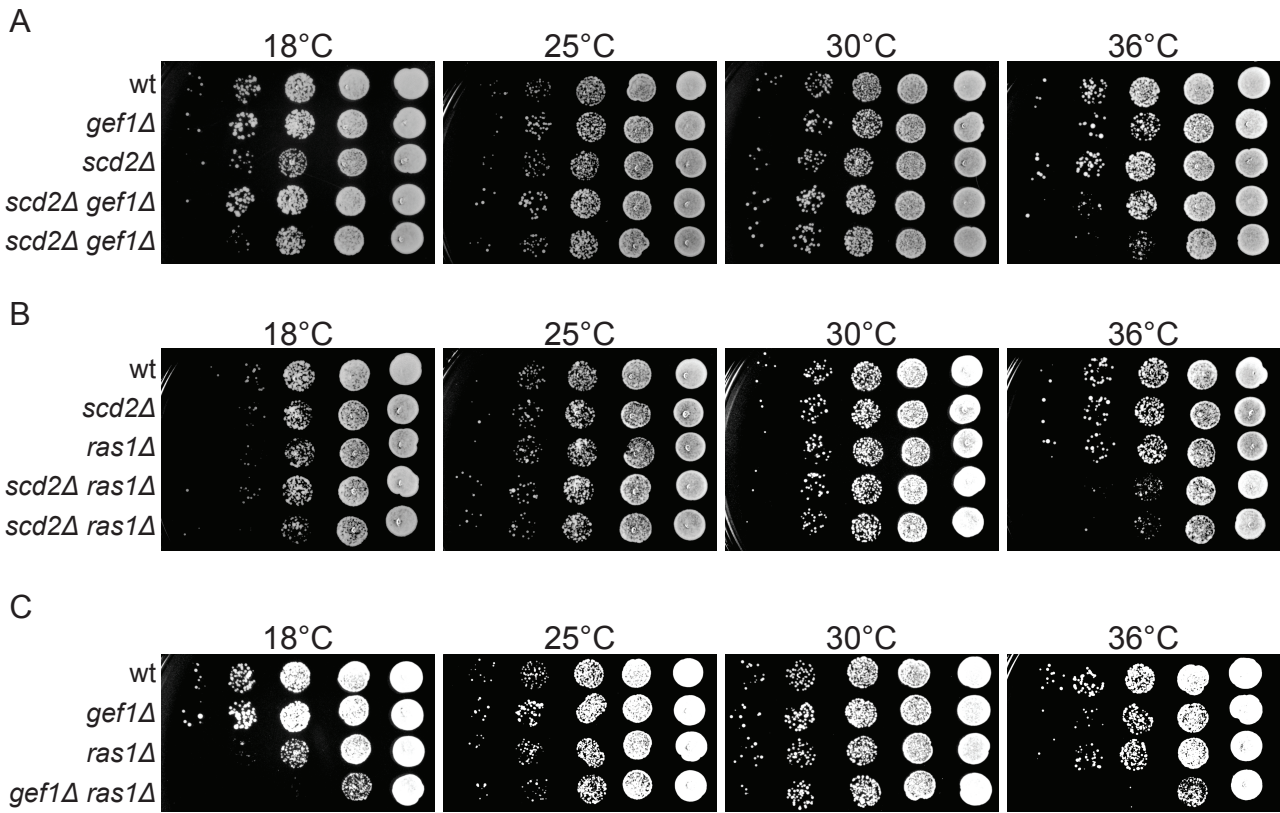

Supplement: pbio.3000600.s001.pdf [file pbio.3000600.s001.pdf]
