# Supplementary material for: Optogenetics reveals Cdc42 local activation by scaffold-mediated positive feedback and Ras GTPase
Source: PLoS Biol. 2020 Jan 24;18(1):e3000600. doi: 10.1371/journal.pbio.3000600 (PMC7002011; doi:10.1371/journal.pbio.3000600)
Supplement: S1 Table — Supporting information for Table 1, showing the genetic crosses performed and the number of spores of indicated genotypes analyzed by tetrad dissection. (XLSX) [file pbio.3000600.s015.xlsx]

## Sheet: Sheet1
Table S1
CROSS	DESIRED GENOTYPE	TOTAL NUMBER OF ANALYZED SPORES	NUMBER OF NON VIABLE SPORES OF DESIRED GENOTYPE	NUMBER OF VIABLE SPORES OF DESIRED GENOTYPE	FULL PARENTAL GENOTYPE
ras1Δ X scd2Δ gef1Δ	scd2Δ gef1Δ	184	1	27	h- ras1::hphMX [pREP41-ras1] x h+ gef1::ura4+ scd2::natMX [pREP41-scd2]
	scd2Δ ras1Δ	184	1	10
	ras1Δ gef1Δ	184	1	22
	scd2Δ gef1Δ ras1Δ	184	13	0
pak1-GBP gef1-3GFP X scd1Δ	scd1Δ gef1-3GFP pak1-GBP	132	0	16	h- gef1-3GFP-kanMX pak1-GBP-mCherry-bleMX x h+ scd1::kanMX [pREP41-scd1]
pak1-GBP scd1-3GFP scd2-K463A X gef1Δ ras1Δ	scd2K463A gef1Δ ras1Δ	300	18	0	h- scd1-3GFP-kanMX pak1-GBP-mCherry-bleMX scd2-K463A-natMX [pREP41-scd2] x h+ gef1::ura4+ ras1::hphMX [pREP41-ras1]
	scd2K463A gef1Δ ras1Δ pak1-GBP scd1-3GFP	300	0	6
scd1-3GFP gef1Δ scd2Δ X pak1-GBP ras1Δ	scd2Δ gef1Δ ras1Δ pak1-GBP scd1-3GFP	160	0	5	h- scd1-3GFP-kanMX gef1::ura4+ scd2::natMX [pREP41-scd2] x h+ pak1-GBP-mCherry-bleMX ras1::hphMX [pREP41-ras1]
scd1-3GFP scd2Δ gef1Δ X tea1-GBP ras1Δ	scd2Δ gef1Δ ras1Δ tea1-GBP scd1-3GFP	196	6	0	h- scd1-3GFP-kanMX gef1::ura4+ scd2::natMX [pREP41-scd2] x h+ tea1-GBP-bleMX ras1::hphMX [pREP41-ras1]
for3-3GFP gef1Δ ras1Δ X scd1-GBP gef1Δ scd2Δ	scd2Δ gef1Δ ras1Δ scd1-GBP for3-3GFP	220	10	0	h- for3-3GFP-kanMX gef1::ura4+ ras1::hphMX [pREP41-ras1] x h+ scd1-GBP-mCherry-bleMX gef1::ura4+ scd2::natMX [pREP41-scd2]
ras1Δ X scd1-3GFP pak1N-term-GBP gef1Δ scd2Δ	scd2Δ gef1Δ ras1Δ pak1N-term-GBP scd1-3GFP	308	0	4	h- ras1::hphMX [pREP41-ras1] x h+ scd1-3GFP-kanMX ura4-pak1N-term-GBP-mCherry-bleMX-ura4+ gef1::ura4+ scd2::natMX [pREP41-scd2]
scd1-1xGFP gef1Δ scd2Δ X pak1-GBP ras1Δ	scd2Δ gef1Δ ras1Δ pak1-GBP scd1-1xGFP	232	0	5	h- pak1-GBP-mCherry-bleMX ras1::hphMX [pREP41-ras1] x h+ scd1-1xGFP-kanMX gef1::ura4+ scd2::natMX [pREP41-scd2]
